# Supplementary material for: Reconfiguration of interfacial energy band structure for high-performance inverted structure perovskite solar cells
Source: PubMed Central journal article supplement (PMC6785549; doi:10.1038/s41467-019-12613-8), 2019-10-09
Supplement: 41467_2019_12613_MOESM3_ESM.pdf [file 41467_2019_12613_MOESM3_ESM.pdf]

## Solar Cells Reporting Summary

Nature Research wishes to improve the reproducibility of the work that we publish. This form is intended for publication with all accepted papers reporting the characterization of photovoltaic devices and provides structure for consistency and transparency in reporting. Some list items might not apply to an individual manuscript, but all fields must be completed for clarity.

For further information on Nature Research policies, including our [data availability policy](#), see [Authors & Referees](#).

### ► Experimental design

#### Please check: are the following details reported in the manuscript?

##### 1. Dimensions

- Area of the tested solar cells  Yes  No Methods section: 0.1 cm<sup>2</sup>.
- Method used to determine the device area  Yes  No Methods section: Device area is defined by cross-overlap of the 0.2 cm wide patterned ITO bar and the 0.5 cm wide Al/Cu bar deposited through a shadow mask.

##### 2. Current-voltage characterization

- Current density-voltage (J-V) plots in both forward and backward direction  Yes  No Fig. 1b
- Voltage scan conditions  Yes  No Main text: the voltage was scanned both in forward direction from -0.2 V to 1.2 V and reverse direction from 1.2 V to -0.2 V with a scan speed 0.02 V/s  
*For instance: scan direction, speed, dwell times*
- Test environment  Yes  No Main text: in N<sub>2</sub>-filled glove box  
*For instance: characterization temperature, in air or in glove box*
- Protocol for preconditioning of the device before its characterization  Yes  No Main text: no preconditioning
- Stability of the J-V characteristic  Yes  No Supplementary Fig. 3: steady-state PCEs were obtained by tracking the maximum power point.  
*Verified with time evolution of the maximum power point or with the photocurrent at maximum power point; see ref. 7 for details.*

##### 3. Hysteresis or any other unusual behaviour

- Description of the unusual behaviour observed during the characterization  Yes  No Main text: negligible hysteresis and no other unusual behavior
- Related experimental data  Yes  No Not relevant

##### 4. Efficiency

- External quantum efficiency (EQE) or incident photons to current efficiency (IPCE)  Yes  No Fig. 1d.
- A comparison between the integrated response under the standard reference spectrum and the response measure under the simulator  Yes  No Main text: the integrated J<sub>sc</sub> obtained from the EQE spectra agrees well with the J<sub>sc</sub> value obtained from the J-V curves under the simulator within 5% deviation
- For tandem solar cells, the bias illumination and bias voltage used for each subcell  Yes  No Not relevant.

##### 5. Calibration

- Light source and reference cell or sensor used for the characterization  Yes  No Methods section: light source: a SS-F5-3A solar simulator (Enli Technology CO., Ltd.) for AM 1.5G illumination (100 mW cm<sup>-2</sup>); reference cell: a standard Si solar cell (SRC-00036)
- Confirmation that the reference cell was calibrated and certified  Yes  No Methods section: the reference cell is calibrated and certified by Enli Technology

|                                                                                                                                                                                               |                                                                        |                                                                                                               |
|-----------------------------------------------------------------------------------------------------------------------------------------------------------------------------------------------|------------------------------------------------------------------------|---------------------------------------------------------------------------------------------------------------|
| Calculation of spectral mismatch between the reference cell and the devices under test                                                                                                        | <input checked="" type="checkbox"/> Yes<br><input type="checkbox"/> No | 1.017                                                                                                         |
| <b>6. Mask/aperture</b>                                                                                                                                                                       |                                                                        |                                                                                                               |
| Size of the mask/aperture used during testing                                                                                                                                                 | <input checked="" type="checkbox"/> Yes<br><input type="checkbox"/> No | Methods section: non-reflective mask with area of 0.049 cm <sup>2</sup> was also used to define the cell area |
| Variation of the measured short-circuit current density with the mask/aperture area                                                                                                           | <input type="checkbox"/> Yes<br><input checked="" type="checkbox"/> No | Not relevant                                                                                                  |
| <b>7. Performance certification</b>                                                                                                                                                           |                                                                        |                                                                                                               |
| Identity of the independent certification laboratory that confirmed the photovoltaic performance                                                                                              | <input type="checkbox"/> Yes<br><input checked="" type="checkbox"/> No | The photovoltaic performance of our devices was not confirmed from independent certification laboratories     |
| A copy of any certificate(s)<br><i>Provide in Supplementary Information</i>                                                                                                                   | <input type="checkbox"/> Yes<br><input checked="" type="checkbox"/> No | Not relevant                                                                                                  |
| <b>8. Statistics</b>                                                                                                                                                                          |                                                                        |                                                                                                               |
| Number of solar cells tested                                                                                                                                                                  | <input checked="" type="checkbox"/> Yes<br><input type="checkbox"/> No | Main text: more than 20 devices for each kind of devices were tested                                          |
| Statistical analysis of the device performance                                                                                                                                                | <input checked="" type="checkbox"/> Yes<br><input type="checkbox"/> No | Fig. 1c, Table 1                                                                                              |
| <b>9. Long-term stability analysis</b>                                                                                                                                                        |                                                                        |                                                                                                               |
| Type of analysis, bias conditions and environmental conditions<br><i>For instance: illumination type, temperature, atmosphere humidity, encapsulation method, preconditioning temperature</i> | <input checked="" type="checkbox"/> Yes<br><input type="checkbox"/> No | Fig. 5a: a shelf-life test in ambient with 40% - 50% and 75% - 85% RH without any encapsulation               |
